# Supplementary material for: Electrochemical Properties of an Sn-Doped LATP Ceramic Electrolyte and Its Derived Sandwich-Structured Composite Solid Electrolyte
Source: MDPI journal article supplement (doi:10.3390/nano12122082), 2022-06-16
Supplement: s1 [file s1]

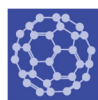

Supplementary Materials

# Electrochemical Properties of an Sn-Doped LATP Ceramic Electrolyte and Its Derived Sandwich-Structured Composite Solid Electrolyte

Aihong Xu <sup>1,2</sup>, Ruoming Wang <sup>1,2</sup>, Mengqin Yao <sup>1,2</sup>, Jianxin Cao <sup>1,2</sup>, Mengjun Li <sup>1,2</sup>, Chunliang Yang <sup>1,2</sup>, Fei Liu <sup>1,2,\*</sup> and Jun Ma <sup>1,2,\*</sup>

<sup>1</sup> Department of Chemical Engineering, School of Chemistry and Chemical Engineering, Guizhou University, Guiyang 550025, China; 15851959055@163.com (A.X.); w1285459785@126.com (R.W.); mqyao@gzu.edu.cn (M.Y.); jxcao@gzu.edu.cn (J.C.); x1285459785@126.com (M.L.); clyang@gzu.edu.cn (C.Y.)

<sup>2</sup> Guizhou Key Laboratory for Green Chemical and Clean Energy Technology, Guiyang 550025, China

\* Correspondence: ce.feiliu@gzu.edu.cn (F.L.); jma3@gzu.edu.cn (J.M.)

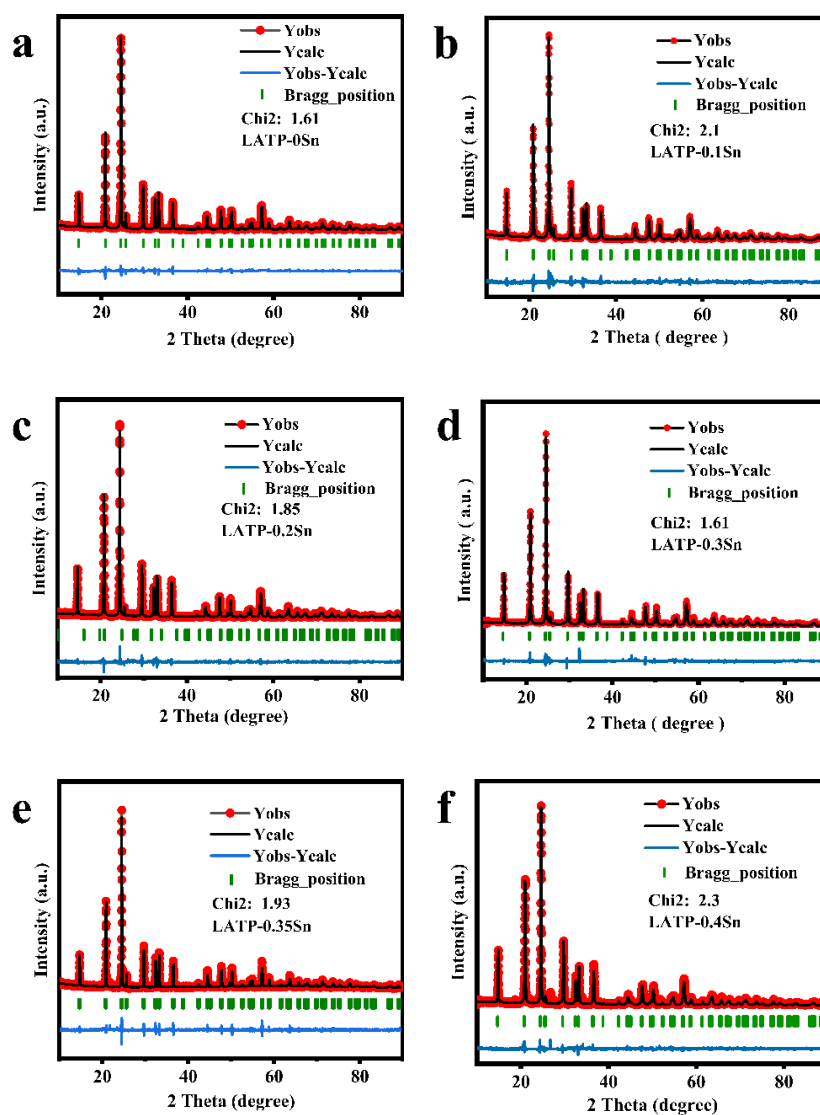

Figure S1. Rietveld refinement of XRD patterns of LATP-xSn ( $x = 0-0.4$ ) solid electrolytes.

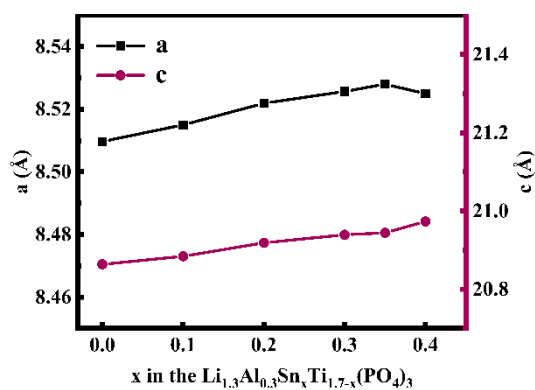

Figure S2. Lattice parameters of LATP-xSn ( $x = 0-0.4$ ) solid electrolytes.

**Table S1.** The deviation degrees of  $\text{Sn}^{4+}$  at  $\text{P}^{5+}$  site,  $\text{Al}^{3+}$  site and  $\text{Ti}^{4+}$  site respectively under different coordination environments.

| Ions                                              | $\text{Sn}^{4+}$ | $\text{P}^{5+}$ | $\text{Al}^{3+}$ | $\text{Ti}^{4+}$ |
|---------------------------------------------------|------------------|-----------------|------------------|------------------|
| Crystal ionic radii with tetrahedral coordination | 69 pm            | 31 pm           | /                | /                |
| Crystal ionic radii with octahedral coordination  | 83 pm            | /               | 67.5 pm          | 74.5 pm          |
| Electronegativity with tetrahedral coordination   | 1.95             | 3.003           | /                | /                |
| Electronegativity with octahedral coordination    | 1.706            | /               | 1.513            | 1.730            |
| Deviation degree                                  | /                | 1.58            | 0.357            | 0.128            |

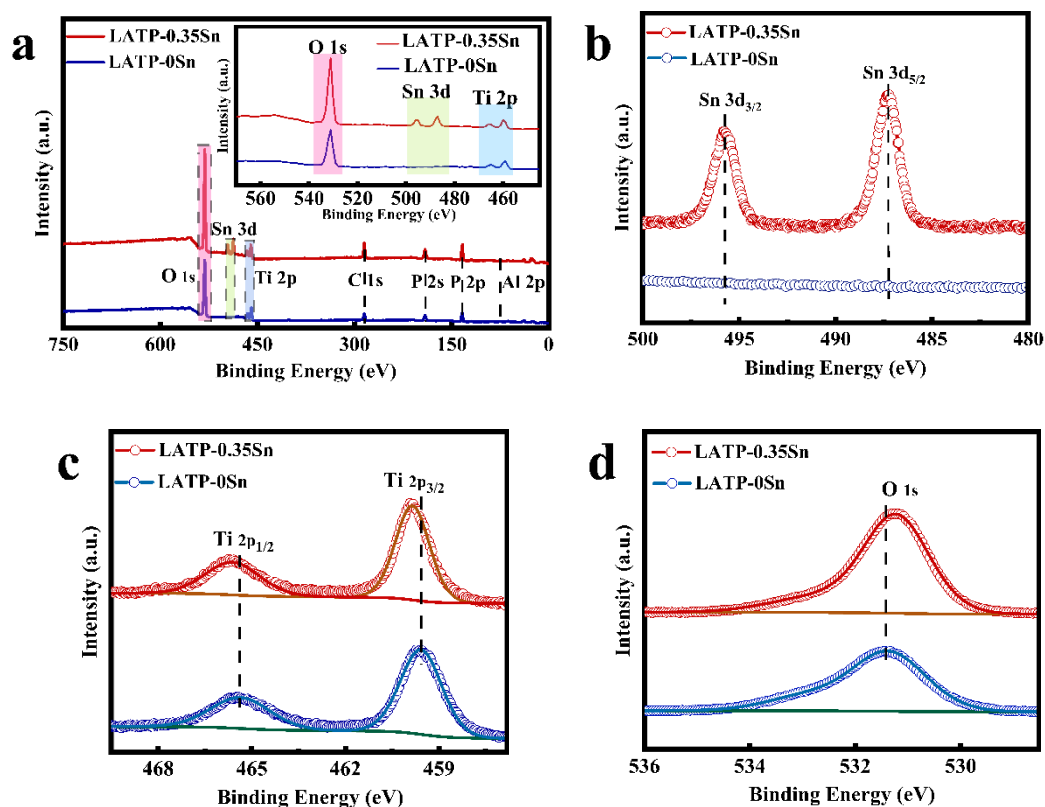**Figure S3.** XPS spectra of LATP-0Sn and LATP-0.35Sn solid electrolytes (a) survey spectra; (b) Sn 3d spectra; (c) Ti 2p spectra; (d) O 1s spectra.

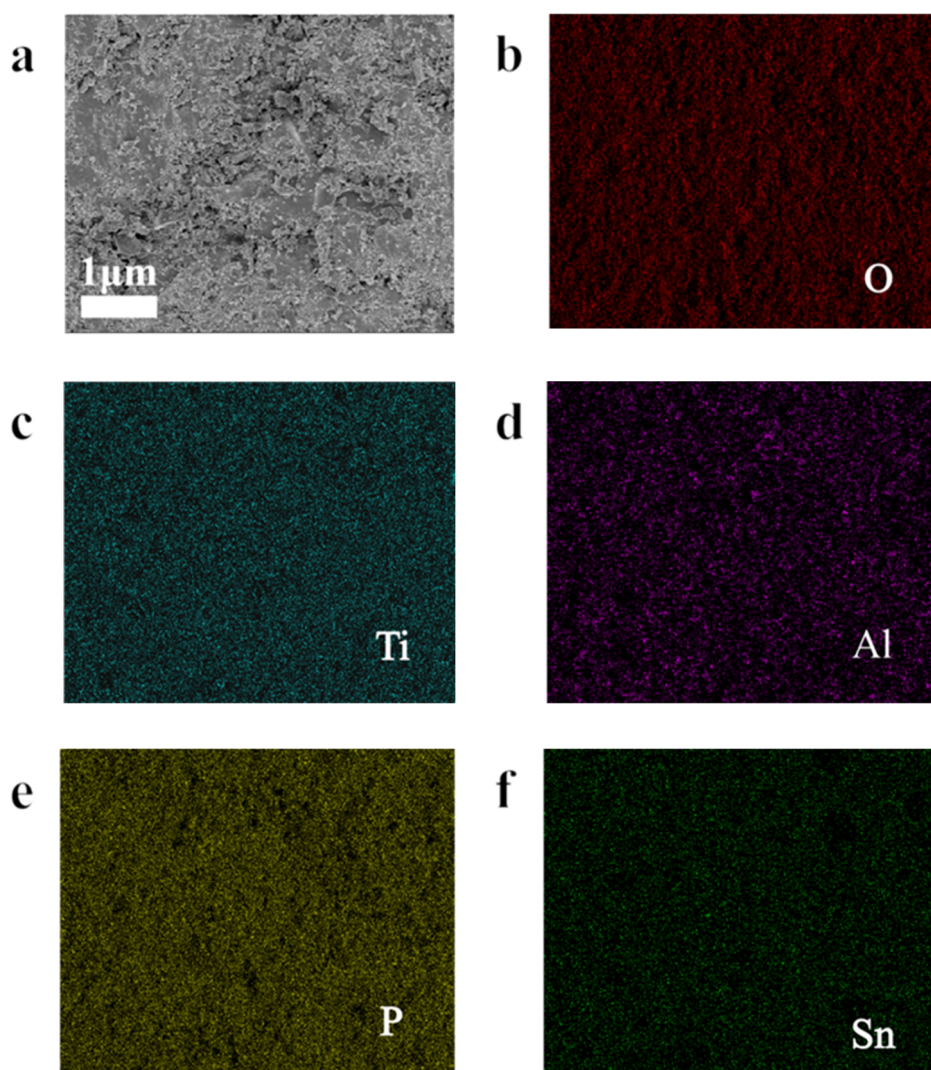

**Figure S4.** (a) SEM image of LATP-0.35Sn solid electrolyte and (b–f) the corresponding EDS elemental maps.

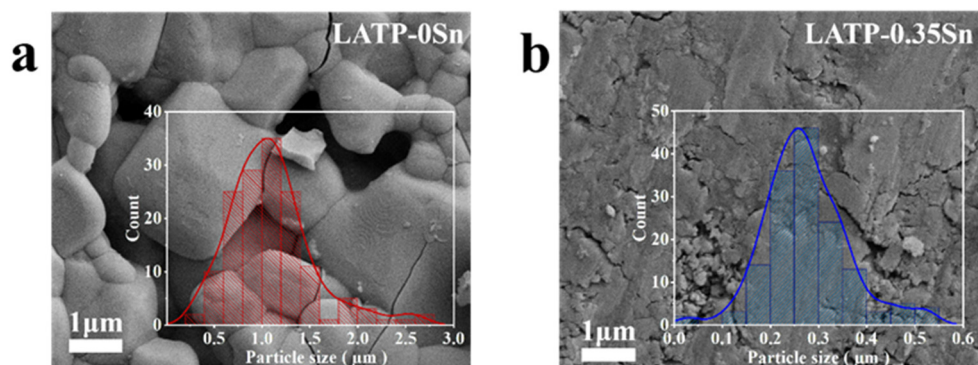

**Figure S5.** SEM images and grain size distribution curves of (a) LATP-0Sn solid electrolyte and (b) LATP-0.35Sn solid electrolyte.

**Table S2.** Performance comparison of LATP-xSn obtained with other typical solid electrolytes.

| Composition                                                                      | Electrolyte-type | Preparation method    | Conductivity (mS/cm) | Reference |
|----------------------------------------------------------------------------------|------------------|-----------------------|----------------------|-----------|
| $\text{Li}_7\text{La}_3\text{Zr}_2\text{O}_{12}$                                 | Garnet           | solid-state reaction  | 0.38                 | 58        |
| $\text{Li}_{3/8}\text{Sr}_{7/16}\text{Hf}_{1/4}\text{Ta}_{3/4}\text{O}_3$        | Perovskite       | solid-state reaction  | 0.38                 | 59        |
| $\text{Li}_{10.42}\text{Ge}_{1.5}\text{P}_{1.5}\text{C}_{10.08}\text{O}_{11.92}$ | LISICON          | melt-casting          | 0.037                | 60        |
| $\text{Li}_3\text{PO}_4$                                                         | LiPON            | magnetron sputtering  | 0.001                | 61        |
| $\beta\text{-Li}_3\text{PS}_4$                                                   | Sulfides         | liquid-phase reaction | 0.27                 | 62        |
| $\text{Li}_3\text{OCl}$                                                          | Anti-perovskite  | PLD                   | 0.2                  | 63        |

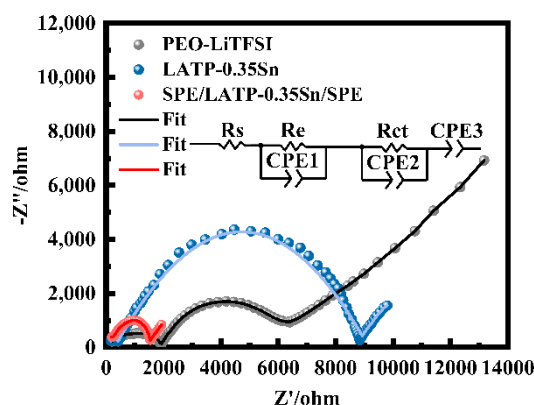**Figure S6.** EIS curves of LATP-0.35Sn and SPE/LATP-0.35Sn/SPE solid electrolytes at 25 °C.**Table S3.** Electrolyte resistance ( $R_e$ ), charge transfer resistance ( $R_{ct}$ ), total resistance ( $R_t$ ) and total ionic conductivities ( $\sigma_t$ ) of PEO-LiTFSI, LATP-0.35Sn and SPE/LATP-0.35Sn/SPE solid electrolytes at 25 °C.

| Electrolytes        | $R_e$ ( $\Omega$ ) | $R_{ct}$ ( $\Omega$ ) | $R_t$ ( $\Omega$ ) | $\sigma_t$ (S/cm)    |
|---------------------|--------------------|-----------------------|--------------------|----------------------|
| PEO-LiTFSI          | 1739               | 4408                  | 6344               | $1.0 \times 10^{-6}$ |
| LATP-0.35Sn         | 413                | 8514                  | 8927               | $1.0 \times 10^{-5}$ |
| SPE/LATP-0.35Sn/SPE | 239                | 1344                  | 1583               | $5.9 \times 10^{-5}$ |

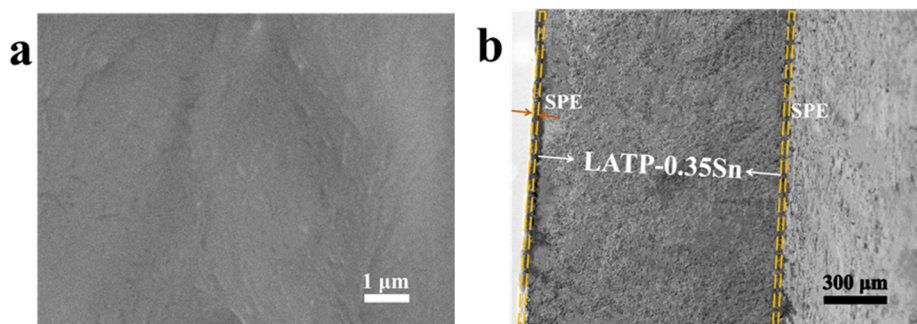**Figure S7.** SEM images of SPE/LATP-0.35Sn/SPE solid electrolytes (a) surface and (b) cross-section.
